# Supplementary material for: Transmission of Vibrio cholerae Is Antagonized by Lytic Phage and Entry into the Aquatic Environment
Source: PLOS journal article supplement (doi:10.1371/journal.ppat.1000187), 2008-10-23
Supplement: S11 (10.1371/journal.ppat.1000187.s011) [file journal.ppat.1000187.s011]

Supplementary Table S10. Microarray data for the patient derived *V. cholerae* (phage +) vs. the *in vitro* derived *V. cholerae* comparison are provided in an Excel spreadsheet (below). Labels for sample types (T0P\*, T5P\*, T24P\*, T0I, T5I, T24I) are as described in Fig. 6. The median normalized intensity values and standard deviations within a given biological grouping are listed as  $\log_2$  values. The associated *P value* (Student's t-test) for a given comparison is listed alongside of each fold-change value. Fold changes for each pair-wise distinction calculation are listed in  $\log_2$ . Fold changes that are  $\geq$  two-fold and have a *P value*  $< 0.01$  are color coded red and green for induction and repression, respectively. Annotations are provided by the J. Craig Venter Institute.

For download please click on attachments at:

<https://wikis.uit.tufts.edu/confluence/display/CamillLaboratory/Home>

Alternatively for direct access:

<https://wikis.uit.tufts.edu/confluence/pages/viewpageattachments.action?pageId=10977522>
